# Supplementary figures and images for: Characterization of Phosphoglycerate Kinase-1 Expression of Stromal Cells Derived from Tumor Microenvironment in Prostate Cancer Progression
Source: Oxford University Press journal article supplement (doi:10.1158/0008-5472.can-09-2863), 2010-01-12

## Wang et al. Supplemental Figure 2

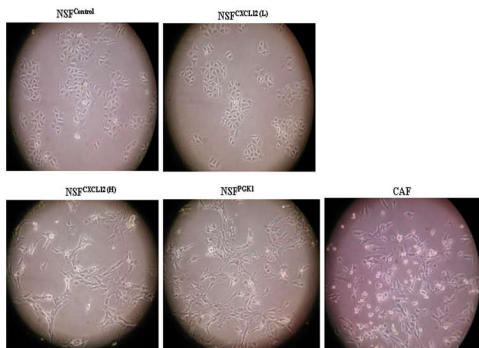

Supplement: 00085472can092863-sup-sfig_2.pdf [file 00085472can092863-sup-sfig_2.pdf]

# Wang et al. Supplemental Figure 3

**A**

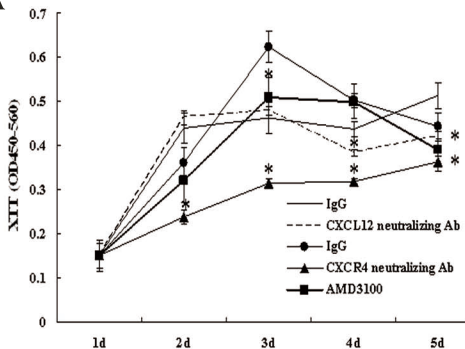

**B**

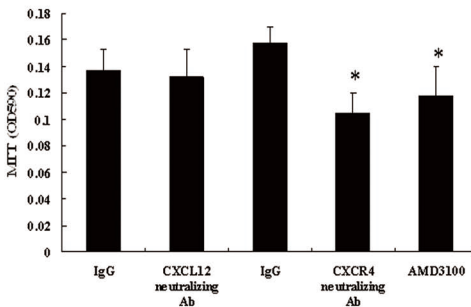

Supplement: 00085472can092863-sup-sfig_3.pdf [file 00085472can092863-sup-sfig_3.pdf]

# Wang et al. Supplemental Figure 4

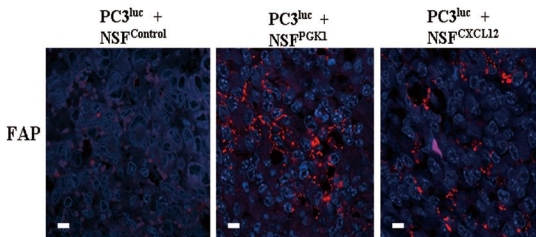

Supplement: 00085472can092863-sup-sfig_4.pdf [file 00085472can092863-sup-sfig_4.pdf]
